# Supplementary material for: The Expanded Universe of Prokaryotic Argonaute Proteins
Source: PubMed Central journal article supplement (PMC6299218; doi:10.1128/mbio.01935-18), 2018-12-18

pAgo\_genes ● 50 ● 100 ● 150 ● 200 ● 250

$r = 0.89, p = 7.6e-14$

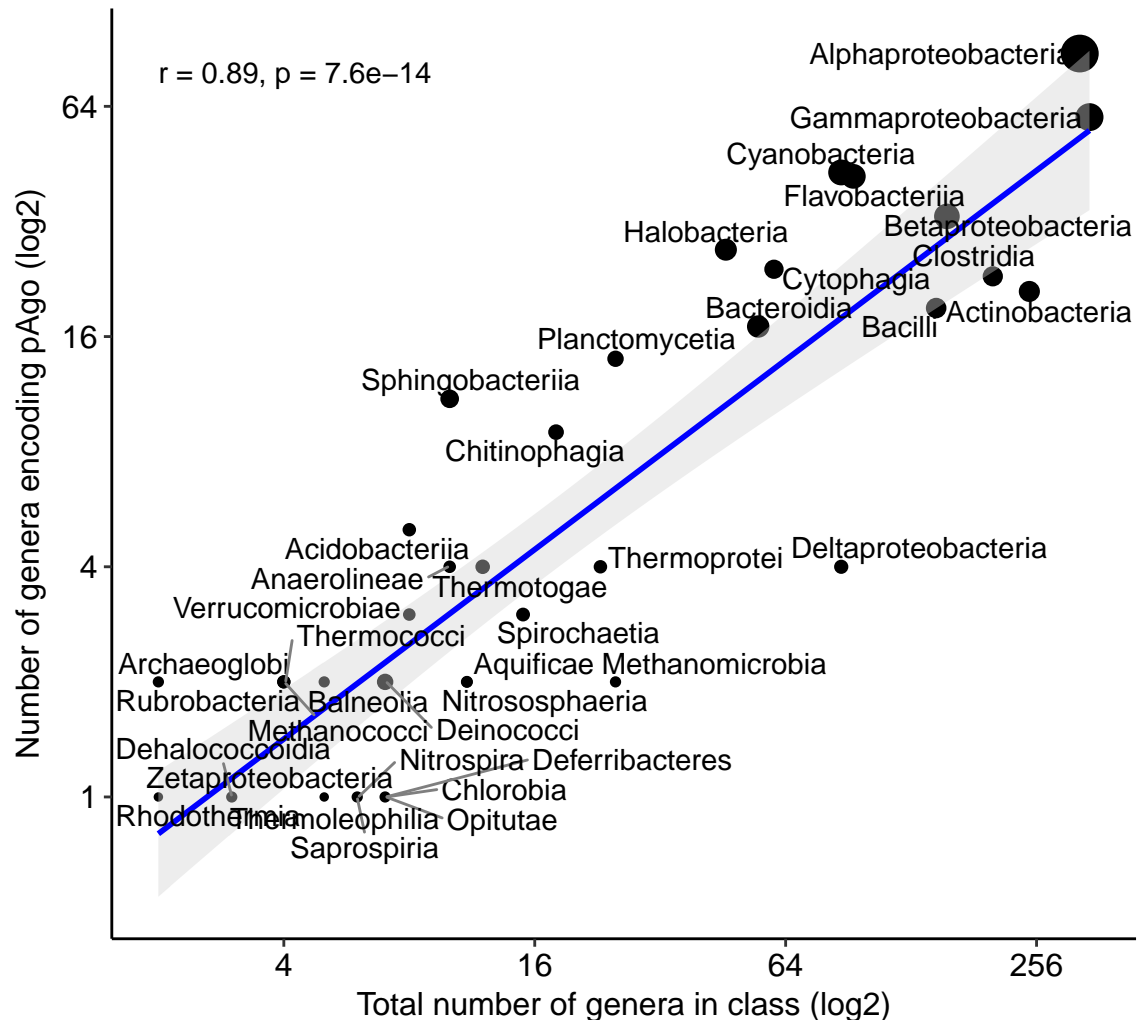

Supplement: mbo006184236sf1.pdf [file mbo006184236sf1.pdf]
