# Supplementary material for: The Expanded Universe of Prokaryotic Argonaute Proteins
Source: PubMed Central journal article supplement (PMC6299218; doi:10.1128/mbio.01935-18), 2018-12-18
Supplement: mbo006184236sf2.pdf [file mbo006184236sf2.pdf]

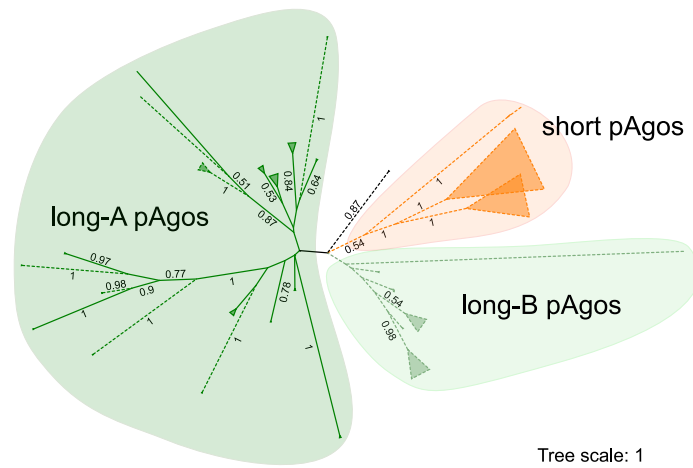

— PIWI domain with catalytic tetrad  
 - - - - - non-active PIWI\* domain
