# Supplementary material for: The Expanded Universe of Prokaryotic Argonaute Proteins
Source: PubMed Central journal article supplement (PMC6299218; doi:10.1128/mbio.01935-18), 2018-12-18
Supplement: mbo006184236sf3.pdf [file mbo006184236sf3.pdf]

*WP\_048095815.1|2234|Archaeoglobus fulgidus* 318 NDF...IKYLRSSSEK...TDEIIRDY...LTKTKVKSART...LRYDSLGVISEV...VWEDRDMKTEKID...TD...KSEFY...EF...WKERHNI...LLEDKQ...LLEIKF...NDS...TF...RY...IAQVVY...IDR...RVIT...420  
*WP\_014511275.1|274|Thermus thermophilus* 177 MS...EAWLAQHR...L...RRTWELL...L...G...EE...D...KEL...G...GG...L...S...L...Y...Y...ASKER...L...LOGR...EG...RVAVWAD...R...K...DR...K...I...RH...L...T...GL...V...VLTLED...270  
*WP\_036488545.1|1542065|Myxosarcina sp. G11* 164 D...ADFE...S...NO...SE...ID...RKR...NH...K...F...TRL...S...OR...O...K...O...K...O...K...O...L...W...Y...D...S...NH...CT...Y...A...O...F...A...E...E...K...T...C...S...T...Y...K...V...K...N...G...D...S...Y...S...E...L...D...Y...O...R...R...S...V...T...S...W...R...E...N...D...V...A...L...V...S...F...S...I...D...H...O...W...A...A...K...R...L...R...L...V...M...E...A...L...235  
*WP\_062303332.1|1914963|Roseivirga seohaensis* 187 N...L...R...A...H...L...L...S...N...A...E...F...N...N...L...K...R...K...R...R...L...V...Y...R...G...L...L...W...Y...D...S...N...H...C...T...Y...A...O...F...A...E...E...K...T...C...S...T...Y...K...V...K...N...G...D...S...Y...S...E...L...D...Y...O...R...R...S...V...T...S...W...R...E...N...D...V...A...L...V...S...F...S...I...D...H...O...W...A...A...K...R...L...R...L...V...M...E...A...L...289  
*WP\_050002102.1|15059071|Thermococcus eurythermalis* 160 S...T...I...M...D...L...I...K...E...L...T...I...E...D...K...I...N...L...I...E...K...T...W...K...I...S...F...R...K...D...I...D...V...S...N...A...V...E...E...I...L...K...V...E...D...S...R...L...D...I...S...K...Y...F...K...R...E...S...L...Y...N...A...E...L...K...R...I...N...Y...F...I...T...R...T...S...L...E...I...D...D...S...K...Y...D...O...K...Y...N...M...I...L...I...T...K...E...K...R...S...Y...H...P...S...R...A...M...L...I...R...266  
*WP\_006620972.1|1195523|Microcoleus vaginatus* 181 G...S...L...S...D...F...Y...E...N...H...Y...R...H...K...Q...E...L...L...S...G...M...K...V...R...V...I...E...T...N...S...A...T...V...N...L...A...G...N...I...E...L...E...K...A...T...C...S...I...S...K...E...L...I...S...A...D...E...Q...V...V...A...V...Q...F...E...K...E...T...K...E...F...H...M...P...M...A...I...Y...P...C...I...T...D...T...A...280  
*WP\_0082035290.1|1160279|Microcystis sp. T1-4* 179 G...D...L...E...Q...I...E...N...H...Y...R...O...D...A...A...K...L...L...V...L...K...V...K...T...I...E...T...N...G...T...A...K...I...R...I...A...G...T...I...E...L...E...K...A...T...C...S...I...S...K...E...L...I...S...A...D...E...Q...V...V...A...V...Q...F...E...K...E...T...K...E...F...H...M...P...M...A...I...Y...P...C...I...T...D...T...A...278  
*WP\_009787621.1|313612|Lyngbya sp. PCC\_8106* 179 G...T...L...A...E...F...Y...A...N...H...Y...R...N...K...K...E...L...L...V...L...K...V...R...D...R...E...T...N...S...A...T...I...V...E...I...A...A...I...D...I...E...L...E...K...A...T...C...S...I...S...K...E...L...I...S...A...D...E...Q...V...V...A...V...Q...F...E...K...E...T...K...E...F...H...M...P...M...A...I...Y...P...C...I...T...D...T...A...278  
*WP\_071455425.1|1188228|Gloeomargarita lithophora* 182 G...N...L...A...E...F...F...Q...N...H...Y...R...O...N...E...K...L...L...V...L...H...V...O...S...L...E...T...G...H...A...I...R...E...I...I...G...S...I...E...L...E...K...A...T...C...S...I...S...K...E...L...I...S...A...D...E...Q...V...V...A...V...Q...F...E...K...E...T...K...E...F...H...M...P...M...A...I...Y...P...C...I...T...D...T...A...281  
*WP\_076523956.1|714067|Krospenstedia eburnea* 162 Q...N...I...E...M...L...R...A...K...I...E...K...C...L...V...V...N...I...R...V...D...H...O...T...Y...W...R...O...L...E...S...S...I...V...D...R...I...L...I...G...N...G...O...S...K...Y...I...A...N...I...A...N...E...R...E...S...W...H...S...L...D...H...T...H...A...V...E...C...L...N...H...K...D...K...P...L...S...F...Y...O...F...L...K...L...V...S...F...D...O...260  
*WP\_093228074.1|462231|Thermofilum microbium dichotomicum* 164 K...S...L...Y...D...M...L...K...E...V...K...I...E...E...N...C...O...V...V...D...I...I...N...R...K...T...Y...H...R...S...I...S...D...Q...T...V...S...O...L...L...S...T...C...E...S...I...D...Y...R...R...N...E...E...E...E...K...Y...E...A...I...G...I...S...T...S...K...P...L...S...F...Y...O...F...L...K...L...V...S...F...D...O...262  
*NP\_213999.1|224324|Aquifex aeolicus\_VF5* 167 E...T...L...Q...T...L...L...R...N...D...F...N...K...R...I...R...V...K...I...G...I...D...F...V...R...Q...D...V...F...K...A...K...E...E...E...F...F...R...L...C...M...E...R...S...T...H...K...S...S...K...K...A...W...E...L...L...K...N...R...E...L...E...K...A...F...L...V...V...L...E...K...E...Y...I...Y...P...A...T...I...L...K...R...V...L...T...Y...E...N...L...264  
*WP\_034383873.1|1540221|Deinococcus sp. YIM 77859* 158 E...A...V...Q...M...W...S...A...A...L...A...T...C...Q...K...H...A...L...D...R...G...O...O...L...H...A...L...M...A...L...L...R...O...D...G...W...H...E...A...N...D...G...A...A...T...O...G...R...W...H...L...S...F...211  
*WP\_034404411.1|1489678|Deinococcus sp. RL* 158 L...D...L...R...A...W...A...Q...E...L...D...S...V...O...L...H...A...L...R...S...G...R...R...E...R...R...M...N...T...W...A...O...R...E...D...R...E...Q...E...R...W...H...L...S...F...211  
*WP\_011011654.1|22621|Pyrococcus furiosus* 153 K...T...L...W...E...L...V...N...K...D...E...K...L...E...E...F...L...M...T...H...K...E...N...L...M...L...K...D...I...A...S...P...L...K...T...V...Y...K...C...F...E...E...Y...T...K...K...E...D...H...N...S...D...M...V...O...L...F...H...I...E...R...Y...W...Y...E...A...K...L...E...F...Y...R...K...F...O...V...D...L...K...Q...A...I...L...A...K...F...A...S...K...I...K...K...K...Y...L...L...D...O...L...V...V...R...T...Y...N...A...E...O...L...277  
*WP\_011910606.1|10631|Rhodobacter sphaeroides* 182 A...S...L...R...D...L...L...E...A...G...I...D...R...G...M...Y...V...R...R...K...R...O...P...G...E...R...G...L...L...R...R...A...I...S...D...D...M...V...O...L...F...H...I...E...R...Y...W...Y...E...A...K...L...E...F...Y...R...K...F...O...V...D...L...K...Q...A...I...L...A...K...F...A...S...K...I...K...K...Y...L...L...D...O...L...V...V...R...T...Y...N...A...E...O...L...252  
*WP\_036798916.1|118161|Pleurocapsa sp. PCC\_7319* 184 S...L...L...O...E...A...G...I...D...E...G...L...Y...V...R...R...K...R...O...P...G...Q...R...L...V...K...I...S...S...F...S...N...G...I...T...H...S...S...F...D...E...I...N...S...I...N...E...F...D...E...I...N...S...I...N...E...N...O...V...W...L...E...G...S...K...K...S...F...R...T...C...L...235  
*WP\_089320862.1|116104923|Pantobacter ummariensis* 161 K...T...C...K...E...L...A...S...E...F...D...T...S...L...E...V...L...R...S...D...Y...L...E...L...K...E...V...L...A...P...D...E...L...I...E...T...W...K...V...E...E...H...A...L...D...T...N...S...H...E...R...K...T...K...Y...N...I...E...A...Y...L...238  
*WP\_077117441.1|1907666|Agrobacterium sp. DSM 25559* 160 A...P...C...S...V...L...L...E...H...E...I...V...V...G...R...Y...V...T...V...R...M...S...S...D...R...V...M...R...R...L...V...G...R...I...S...V...E...G...D...I...L...T...I...S...P...S...S...E...A...L...F...T...V...T...A...S...E...A...L...F...R...E...I...I...E...D...V...C...236  
*WP\_012597165.1|41431|Cyanotheca sp. PCC\_8801* 166 A...S...L...S...N...L...O...A...O...G...V...N...R...D...L...Y...V...V...R...R...O...C...K...T...G...E...R...R...L...V...G...K...I...D...S...L...T...H...G...I...N...I...N...S...S...Y...N...N...L...S...O...I...H...E...D...E...I...W...L...E...G...S...K...A...S...F...S...H...C...L...237  
*WP\_004492459.1|281831|Leptospira santarosai* 84 ---F...S...L...N...R...L...K...N...G...S...H...Y...E...F...S...H...Y...P...I...L...H...K...R...Y...Y...Y...F...M...S...Q...E...S...K...F...F...L...140  
*WP\_009361466.1|690871|Anoxybacillus sp. DT3-1* 84 ---E...S...L...D...R...V...Q...K...S...L...S...S...D...E...L...L...L...Y...S...S...D...R...V...M...R...R...L...V...G...R...I...S...V...E...G...D...I...L...T...I...S...P...S...S...E...A...L...F...T...V...T...A...S...E...A...L...F...R...E...I...I...E...D...V...C...140  
*WP\_014295921.1|149715|Marinitoga piezophila* 156 P...A...L...E...S...A...I...K...S...E...Y...L...Y...N...I...K...S...E...K...S...F...E...L...K...I...D...I...G...N...N...Q...I...V...E...A...V...P...E...N...L...F...N...F...208  
*WP\_035658611.1|1492738|Flavobacterium seoulense* 234 ---E...K...I...V...E...H...T...S...K...D...L...K...Q...A...I...M...F...L...N...D...I...L...S...N...L...S...F...L...N...H...E...R...M...F...K...V...N...I...S...E...L...D...R...K...N...L...L...I...G...S...S...F...290

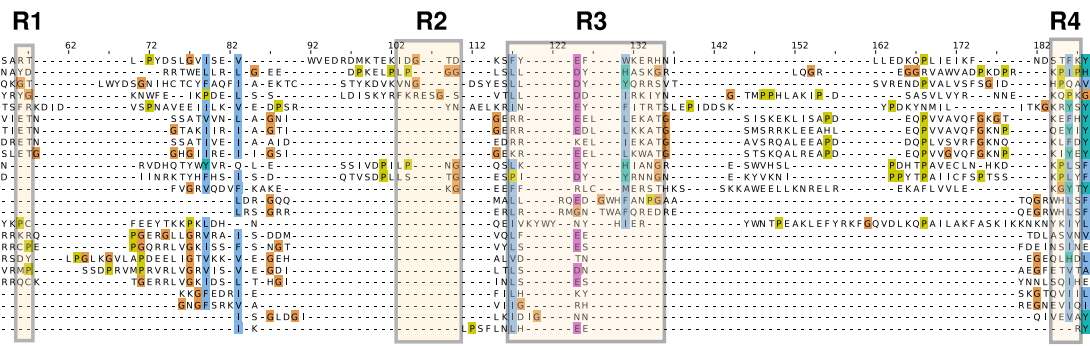

PAZ

PAZ\*
